# Supplementary material
Source: PubMed Central journal article supplement (PMC3567748)
Supplement: 1d71efb3b11eb5fbda07bb4d3cdd62fc_genetics.112.147595-14.pdf [file 1d71efb3b11eb5fbda07bb4d3cdd62fc_genetics.112.147595-14.pdf]

**Table S1** List of maize lines in population structure analysis (based on 5,000 SNPs) showing the subpopulations they are assigned to, their origin and their probability values of membership.

| <i>sno</i> | <i>line</i> | TS   | SS   | NSS  | state/country | <i>group</i> | <i>sno</i> | <i>line</i> | TS   | SS   | NSS  | state/country | <i>group</i> |
|------------|-------------|------|------|------|---------------|--------------|------------|-------------|------|------|------|---------------|--------------|
| 1          | 4226        | 0.22 | 0.11 | 0.68 | Illinois      | <i>mixed</i> | 141        | Il14H       | 0.00 | 0.04 | 0.96 | Illinois      | NSS          |
| 2          | 4722        | 0.00 | 0.02 | 0.97 | Indiana       | NSS          | 142        | Il677a      | 0.04 | 0.07 | 0.89 | Illinois      | NSS          |
| 3          | 33-16       | 0.14 | 0.09 | 0.78 | Indiana       | <i>mixed</i> | 143        | K148        | 0.22 | 0.05 | 0.73 | Kansas        | <i>mixed</i> |
| 4          | 38-11       | 0.00 | 0.18 | 0.82 | Indiana       | NSS          | 144        | K4          | 0.21 | 0.15 | 0.65 | Kansas        | <i>mixed</i> |
| 5          | A188        | 0.19 | 0.12 | 0.70 | Minnesota     | <i>mixed</i> | 145        | K55         | 0.27 | 0.13 | 0.60 | Kansas        | <i>mixed</i> |
| 6          | A214N       | 0.28 | 0.62 | 0.10 | Minnesota     | <i>mixed</i> | 146        | K64         | 0.20 | 0.13 | 0.67 | Kansas        | <i>mixed</i> |
| 7          | A239        | 0.02 | 0.21 | 0.77 | Minnesota     | <i>mixed</i> | 147        | Ki11        | 0.81 | 0.05 | 0.14 | Thailand      | TS           |
| 8          | A272        | 0.53 | 0.04 | 0.42 | South Africa  | <i>mixed</i> | 148        | Ki14        | 0.93 | 0.07 | 0.01 | Thailand      | TS           |
| 9          | A441-5      | 0.44 | 0.09 | 0.47 | Tennessee     | <i>mixed</i> | 149        | Ki2021      | 0.93 | 0.02 | 0.05 | Thailand      | TS           |
| 10         | A554        | 0.08 | 0.12 | 0.80 | Minnesota     | NSS          | 150        | Ki21        | 0.50 | 0.00 | 0.50 | Thailand      | <i>mixed</i> |
| 11         | A556        | 0.21 | 0.12 | 0.67 | Minnesota     | <i>mixed</i> | 151        | Ki3         | 0.99 | 0.01 | 0.00 | Thailand      | TS           |
| 12         | A6          | 0.95 | 0.02 | 0.03 | Minnesota     | TS           | 152        | Ki43        | 0.89 | 0.02 | 0.09 | Thailand      | TS           |
| 13         | A619        | 0.00 | 0.18 | 0.82 | Minnesota     | NSS          | 153        | Ki44        | 0.87 | 0.06 | 0.08 | Thailand      | TS           |
| 14         | A632        | 0.00 | 0.82 | 0.18 | Minnesota     | SS           | 154        | Ky21        | 0.18 | 0.15 | 0.67 | Kentucky      | <i>mixed</i> |
| 15         | A634        | 0.02 | 0.78 | 0.20 | Minnesota     | <i>mixed</i> | 155        | Ky226       | 0.48 | 0.12 | 0.41 | Kentucky      | <i>mixed</i> |
| 16         | A635        | 0.00 | 0.81 | 0.19 | Minnesota     | SS           | 156        | Ky228       | 0.20 | 0.13 | 0.67 | Kentucky      | <i>mixed</i> |
| 17         | A641        | 0.00 | 0.57 | 0.43 | Minnesota     | <i>mixed</i> | 157        | L317        | 0.12 | 0.10 | 0.78 | Iowa          | <i>mixed</i> |
| 18         | A654        | 0.14 | 0.12 | 0.74 | Minnesota     | <i>mixed</i> | 158        | L578        | 0.43 | 0.09 | 0.48 | Louisiana     | <i>mixed</i> |
| 19         | A659        | 0.05 | 0.21 | 0.74 | Minnesota     | <i>mixed</i> | 159        | M14         | 0.06 | 0.20 | 0.74 | Illinois      | <i>mixed</i> |
| 20         | A661        | 0.12 | 0.18 | 0.69 | Minnesota     | <i>mixed</i> | 160        | M162W       | 0.41 | 0.06 | 0.53 | South Africa  | <i>mixed</i> |
| 21         | A679        | 0.00 | 0.94 | 0.06 | Minnesota     | SS           | 161        | M37W        | 0.52 | 0.07 | 0.41 | South Africa  | <i>mixed</i> |
| 22         | A680        | 0.00 | 1.00 | 0.00 | Minnesota     | SS           | 162        | MEF156-55-2 | 0.03 | 0.06 | 0.92 | EGYPT?        | NSS          |
| 23         | A682        | 0.00 | 0.00 | 1.00 | Minnesota     | NSS          | 163        | Mo17        | 0.00 | 0.00 | 1.00 | Missouri      | NSS          |
| 24         | Ab28A       | 0.26 | 0.13 | 0.61 | Alabama       | <i>mixed</i> | 164        | Mo18W       | 0.72 | 0.03 | 0.26 | Missouri      | <i>mixed</i> |
| 25         | B10         | 0.00 | 0.62 | 0.38 | Iowa          | <i>mixed</i> | 165        | Mo1W        | 0.34 | 0.09 | 0.57 | Missouri      | <i>mixed</i> |
| 26         | B103        | 0.00 | 0.25 | 0.75 | Iowa          | <i>mixed</i> | 166        | Mo24W       | 0.31 | 0.09 | 0.60 | Missouri      | <i>mixed</i> |
| 27         | B104        | 0.00 | 0.74 | 0.25 | Iowa          | <i>mixed</i> | 167        | Mo44        | 0.06 | 0.16 | 0.78 | Missouri      | <i>mixed</i> |
| 28         | B105        | 0.09 | 0.43 | 0.48 | Iowa          | <i>mixed</i> | 168        | Mo45        | 0.21 | 0.21 | 0.59 | Missouri      | <i>mixed</i> |
| 29         | B109        | 0.00 | 0.93 | 0.07 | Iowa          | SS           | 169        | Mo46        | 0.17 | 0.20 | 0.63 | Missouri      | <i>mixed</i> |
| 30         | B115        | 0.13 | 0.12 | 0.75 | Iowa          | <i>mixed</i> | 170        | Mo47        | 0.32 | 0.19 | 0.49 | Missouri      | <i>mixed</i> |
| 31         | B14A        | 0.00 | 1.00 | 0.00 | Iowa          | SS           | 171        | MoG         | 0.14 | 0.11 | 0.75 | Missouri      | <i>mixed</i> |
| 32         | B164        | 0.10 | 0.24 | 0.65 | Minnesota     | <i>mixed</i> | 172        | Mp339       | 0.42 | 0.11 | 0.47 | Mississippi   | <i>mixed</i> |
| 33         | B2          | 0.12 | 0.19 | 0.70 | Missouri      | <i>mixed</i> | 173        | MS1334      | 0.15 | 0.12 | 0.72 | Michigan      | <i>mixed</i> |
| 34         | B37         | 0.00 | 0.62 | 0.38 | Iowa          | <i>mixed</i> | 174        | MS153       | 0.06 | 0.15 | 0.80 | Michigan      | NSS          |
| 35         | B46         | 0.01 | 0.38 | 0.61 | Iowa          | <i>mixed</i> | 175        | MS71        | 0.01 | 0.15 | 0.84 | Michigan      | NSS          |
| 36         | B52         | 0.03 | 0.20 | 0.78 | Iowa          | <i>mixed</i> | 176        | Mt42        | 0.13 | 0.17 | 0.70 | Minnesota     | <i>mixed</i> |

|    |          |      |      |      |                 |              |     |        |      |      |      |                |              |
|----|----------|------|------|------|-----------------|--------------|-----|--------|------|------|------|----------------|--------------|
| 37 | B57      | 0.21 | 0.09 | 0.70 | Iowa            | <i>mixed</i> | 177 | N192   | 0.00 | 1.00 | 0.00 | Nebraska       | SS           |
| 38 | B64      | 0.28 | 0.68 | 0.04 | Iowa            | <i>mixed</i> | 178 | N28Ht  | 0.09 | 0.37 | 0.54 | Nebraska       | <i>mixed</i> |
| 39 | B68      | 0.15 | 0.85 | 0.00 | Iowa            | SS           | 179 | N6     | 0.12 | 0.10 | 0.78 | Nebraska       | <i>mixed</i> |
| 40 | B73      | 0.00 | 1.00 | 0.00 | Iowa            | SS           | 180 | N7A    | 0.01 | 0.49 | 0.50 | Nebraska       | <i>mixed</i> |
| 41 | B73Htrhm | 0.00 | 1.00 | 0.00 | Iowa            | SS           | 181 | NC222  | 0.25 | 0.09 | 0.67 | North Carolina | <i>mixed</i> |
| 42 | B75      | 0.12 | 0.20 | 0.68 | Iowa            | <i>mixed</i> | 182 | NC230  | 0.26 | 0.09 | 0.65 | North Carolina | <i>mixed</i> |
| 43 | B76      | 0.01 | 0.50 | 0.49 | Iowa            | <i>mixed</i> | 183 | NC232  | 0.40 | 0.05 | 0.55 | North Carolina | <i>mixed</i> |
| 44 | B77      | 0.15 | 0.11 | 0.74 | Iowa            | <i>mixed</i> | 184 | NC236  | 0.21 | 0.13 | 0.66 | North Carolina | <i>mixed</i> |
| 45 | B79      | 0.00 | 0.34 | 0.66 | Iowa            | <i>mixed</i> | 185 | NC238  | 0.39 | 0.06 | 0.55 | North Carolina | <i>mixed</i> |
| 46 | B84      | 0.00 | 0.76 | 0.24 | Iowa            | <i>mixed</i> | 186 | NC250  | 0.25 | 0.48 | 0.27 | North Carolina | <i>mixed</i> |
| 47 | B97      | 0.05 | 0.13 | 0.82 | Iowa            | NSS          | 187 | NC258  | 0.00 | 0.00 | 1.00 | North Carolina | NSS          |
| 48 | C103     | 0.00 | 0.00 | 1.00 | Conneticut      | NSS          | 188 | NC260  | 0.12 | 0.11 | 0.77 | North Carolina | <i>mixed</i> |
| 49 | C123     | 0.06 | 0.00 | 0.94 | Conneticut      | NSS          | 189 | NC262  | 0.00 | 0.00 | 1.00 | North Carolina | NSS          |
| 50 | C49A     | 0.10 | 0.15 | 0.75 | Minnesota       | <i>mixed</i> | 190 | NC264  | 0.56 | 0.04 | 0.40 | North Carolina | <i>mixed</i> |
| 51 | CH701-30 | 0.07 | 0.18 | 0.75 | Canada - Harrow | <i>mixed</i> | 191 | NC290A | 0.00 | 0.00 | 1.00 | North Carolina | NSS          |
| 52 | CH9      | 0.14 | 0.14 | 0.72 | Canada - Harrow | <i>mixed</i> | 192 | NC294  | 0.00 | 0.96 | 0.04 | North Carolina | SS           |
| 53 | CI.7     | 0.11 | 0.12 | 0.76 | USDA            | <i>mixed</i> | 193 | NC296  | 1.00 | 0.00 | 0.00 | North Carolina | TS           |
| 54 | CI187-2  | 0.00 | 0.14 | 0.86 | USDA            | NSS          | 194 | NC296A | 1.00 | 0.00 | 0.00 | North Carolina | TS           |
| 55 | CI21E    | 0.17 | 0.28 | 0.55 | USDA            | <i>mixed</i> | 195 | NC298  | 1.00 | 0.00 | 0.00 | North Carolina | TS           |
| 56 | CI28A    | 0.31 | 0.13 | 0.56 | USDA            | <i>mixed</i> | 196 | NC300  | 1.00 | 0.00 | 0.00 | North Carolina | TS           |
| 57 | CI31A    | 0.20 | 0.17 | 0.63 | USDA            | <i>mixed</i> | 197 | NC279  | 1.00 | 0.00 | 0.00 | North Carolina | TS           |
| 58 | CI3A     | 0.12 | 0.13 | 0.75 | USDA            | <i>mixed</i> | 198 | NC304  | 1.00 | 0.00 | 0.00 | North Carolina | TS           |
| 59 | CI64     | 0.39 | 0.08 | 0.53 | USDA            | <i>mixed</i> | 199 | NC306  | 0.00 | 1.00 | 0.00 | North Carolina | SS           |
| 60 | CI66     | 0.38 | 0.10 | 0.52 | USDA            | <i>mixed</i> | 200 | NC310  | 0.00 | 1.00 | 0.00 | North Carolina | SS           |
| 61 | CI90C    | 0.35 | 0.12 | 0.53 | USDA            | <i>mixed</i> | 201 | NC314  | 0.05 | 0.88 | 0.07 | North Carolina | SS           |
| 62 | CI91B    | 0.00 | 0.14 | 0.85 | USDA            | NSS          | 202 | NC318  | 0.55 | 0.04 | 0.41 | North Carolina | <i>mixed</i> |
| 63 | CM105    | 0.00 | 0.73 | 0.27 | Canada-Morden   | <i>mixed</i> | 203 | NC320  | 0.58 | 0.06 | 0.37 | North Carolina | <i>mixed</i> |
| 64 | CM174    | 0.00 | 0.72 | 0.28 | Canada-Morden   | <i>mixed</i> | 204 | NC324  | 0.09 | 0.84 | 0.06 | North Carolina | SS           |
| 65 | CM37     | 0.01 | 0.11 | 0.89 | Canada-Morden   | NSS          | 205 | NC326  | 0.00 | 1.00 | 0.00 | North Carolina | SS           |
| 66 | CM7      | 0.16 | 0.11 | 0.72 | Canada-Morden   | <i>mixed</i> | 206 | NC328  | 0.00 | 1.00 | 0.00 | North Carolina | SS           |
| 67 | CML10    | 1.00 | 0.00 | 0.00 | Mexico          | TS           | 207 | NC33   | 0.32 | 0.07 | 0.60 | North Carolina | <i>mixed</i> |
| 68 | CML103   | 0.70 | 0.03 | 0.27 | Mexico          | <i>mixed</i> | 208 | NC336  | 1.00 | 0.00 | 0.00 | North Carolina | TS           |
| 69 | CML108   | 0.70 | 0.03 | 0.27 | Mexico          | <i>mixed</i> | 209 | NC338  | 1.00 | 0.00 | 0.00 | North Carolina | TS           |
| 70 | CML11    | 1.00 | 0.00 | 0.00 | Mexico          | TS           | 210 | NC340  | 1.00 | 0.00 | 0.00 | North Carolina | TS           |
| 71 | CML14    | 0.94 | 0.01 | 0.05 | Mexico          | TS           | 211 | NC342  | 0.00 | 0.00 | 1.00 | North Carolina | NSS          |
| 72 | CML154Q  | 0.96 | 0.02 | 0.02 | Mexico          | TS           | 212 | NC344  | 0.00 | 0.00 | 1.00 | North Carolina | NSS          |
| 73 | CML157Q  | 0.93 | 0.00 | 0.07 | Mexico          | TS           | 213 | NC346  | 1.00 | 0.00 | 0.00 | North Carolina | TS           |
| 74 | CML158Q  | 0.96 | 0.00 | 0.04 | Mexico          | TS           | 214 | NC348  | 1.00 | 0.00 | 0.00 | North Carolina | TS           |
| 75 | CML218   | 0.93 | 0.01 | 0.06 | Mexico          | TS           | 215 | NC350  | 1.00 | 0.00 | 0.00 | North Carolina | TS           |

|     |        |      |      |      |                 |              |     |        |      |      |      |                |              |
|-----|--------|------|------|------|-----------------|--------------|-----|--------|------|------|------|----------------|--------------|
| 76  | CML220 | 0.95 | 0.04 | 0.01 | Mexico          | TS           | 216 | NC352  | 1.00 | 0.00 | 0.00 | North Carolina | TS           |
| 77  | CML228 | 0.99 | 0.00 | 0.01 | Mexico          | TS           | 217 | NC354  | 1.00 | 0.00 | 0.00 | North Carolina | TS           |
| 78  | CML238 | 0.99 | 0.01 | 0.00 | Mexico          | TS           | 218 | NC356  | 0.94 | 0.00 | 0.06 | North Carolina | TS           |
| 79  | CML247 | 0.99 | 0.01 | 0.00 | Mexico          | TS           | 219 | NC358  | 0.93 | 0.00 | 0.07 | North Carolina | TS           |
| 80  | CML254 | 0.99 | 0.00 | 0.00 | Mexico          | TS           | 220 | NC360  | 0.42 | 0.01 | 0.58 | North Carolina | <i>mixed</i> |
| 81  | CML258 | 0.99 | 0.01 | 0.00 | Mexico          | TS           | 221 | NC362  | 0.29 | 0.00 | 0.71 | North Carolina | <i>mixed</i> |
| 82  | CML261 | 0.93 | 0.00 | 0.06 | Mexico          | TS           | 222 | NC364  | 0.29 | 0.00 | 0.71 | North Carolina | <i>mixed</i> |
| 83  | CML264 | 0.96 | 0.02 | 0.02 | Mexico          | TS           | 223 | NC366  | 0.50 | 0.07 | 0.44 | North Carolina | <i>mixed</i> |
| 84  | CML277 | 0.96 | 0.03 | 0.01 | Mexico          | TS           | 224 | NC368  | 0.08 | 0.92 | 0.00 | North Carolina | SS           |
| 85  | CML281 | 0.99 | 0.00 | 0.01 | Mexico          | TS           | 225 | ND246  | 0.12 | 0.08 | 0.80 | North Dakota   | NSS          |
| 86  | CML287 | 0.97 | 0.02 | 0.01 | Mexico          | TS           | 226 | Oh40B  | 0.00 | 0.15 | 0.85 | Ohio           | NSS          |
| 87  | CML311 | 0.87 | 0.01 | 0.12 | Mexico          | TS           | 227 | Oh43   | 0.00 | 0.21 | 0.79 | Ohio           | <i>mixed</i> |
| 88  | CML314 | 0.94 | 0.04 | 0.02 | Mexico          | TS           | 228 | Oh43E  | 0.00 | 0.17 | 0.83 | Ohio           | NSS          |
| 89  | CML321 | 0.89 | 0.01 | 0.10 | Mexico          | TS           | 229 | Oh603  | 0.38 | 0.05 | 0.57 | Ohio           | <i>mixed</i> |
| 90  | CML322 | 0.90 | 0.07 | 0.04 | Mexico          | TS           | 230 | Oh7B   | 0.04 | 0.28 | 0.68 | Ohio           | <i>mixed</i> |
| 91  | CML323 | 0.73 | 0.08 | 0.20 | Mexico          | <i>mixed</i> | 231 | Os420  | 0.08 | 0.19 | 0.73 | Iowa           | <i>mixed</i> |
| 92  | CML328 | 0.82 | 0.04 | 0.15 | Mexico          | TS           | 232 | P39    | 0.00 | 0.02 | 0.98 | Indiana        | NSS          |
| 93  | CML331 | 0.98 | 0.02 | 0.00 | Mexico          | TS           | 233 | Pa762  | 0.00 | 0.13 | 0.87 | Pennsylvania   | NSS          |
| 94  | CML332 | 1.00 | 0.00 | 0.00 | Mexico          | TS           | 234 | Pa875  | 0.27 | 0.12 | 0.61 | Pennsylvania   | <i>mixed</i> |
| 95  | CML333 | 0.82 | 0.02 | 0.16 | Mexico          | TS           | 235 | Pa880  | 0.25 | 0.13 | 0.62 | Pennsylvania   | <i>mixed</i> |
| 96  | CML341 | 0.98 | 0.01 | 0.01 | Mexico          | TS           | 236 | PA91   | 0.00 | 0.14 | 0.86 | Pennsylvania   | NSS          |
| 97  | CML38  | 0.98 | 0.01 | 0.01 | Mexico          | TS           | 237 | R109B  | 0.17 | 0.19 | 0.64 | Illinois       | <i>mixed</i> |
| 98  | CML45  | 0.99 | 0.00 | 0.00 | Mexico          | TS           | 238 | R168   | 0.00 | 0.15 | 0.85 | Illinois       | NSS          |
| 99  | CML5   | 0.95 | 0.01 | 0.04 | Mexico          | TS           | 239 | R177   | 0.06 | 0.10 | 0.85 | Illinois       | NSS          |
| 100 | CML52  | 0.96 | 0.04 | 0.00 | Mexico          | TS           | 240 | R229   | 0.03 | 0.97 | 0.00 | Illinois       | SS           |
| 101 | CML61  | 0.99 | 0.01 | 0.00 | Mexico          | TS           | 241 | R4     | 0.00 | 0.20 | 0.79 | Illinois       | <i>mixed</i> |
| 102 | CML69  | 0.99 | 0.01 | 0.00 | Mexico          | TS           | 242 | SA24   | 0.00 | 0.03 | 0.96 | Indiana        | NSS          |
| 103 | CML77  | 0.81 | 0.04 | 0.15 | Mexico          | TS           | 243 | SC213R | 0.36 | 0.05 | 0.59 | South Carolina | <i>mixed</i> |
| 104 | CML91  | 0.75 | 0.05 | 0.20 | Mexico          | <i>mixed</i> | 244 | SC357  | 0.38 | 0.12 | 0.51 | South Carolina | <i>mixed</i> |
| 105 | CML92  | 0.77 | 0.10 | 0.13 | Mexico          | <i>mixed</i> | 245 | SC55   | 0.45 | 0.05 | 0.50 | South Carolina | <i>mixed</i> |
| 106 | CMV3   | 0.11 | 0.20 | 0.69 | Minnesota       | <i>mixed</i> | 246 | SD40   | 0.03 | 0.41 | 0.56 | South Dakota   | <i>mixed</i> |
| 107 | CO106  | 0.09 | 0.15 | 0.77 | Canada-Ottawa   | <i>mixed</i> | 247 | SD44   | 0.13 | 0.18 | 0.69 | South Dakota   | <i>mixed</i> |
| 108 | CO125  | 0.18 | 0.10 | 0.73 | Calanda-Ontario | <i>mixed</i> | 248 | Sg1533 | 0.01 | 0.05 | 0.94 | Indiana        | NSS          |
| 109 | CO255  | 0.20 | 0.06 | 0.75 | Canada-Ottawa   | <i>mixed</i> | 249 | Sg18   | 0.00 | 0.08 | 0.92 | Indiana        | NSS          |
| 110 | D940Y  | 0.25 | 0.10 | 0.65 | South Africa    | <i>mixed</i> | 250 | T232   | 0.33 | 0.19 | 0.48 | Tennessee      | <i>mixed</i> |
| 111 | DE_2   | 0.10 | 0.15 | 0.76 | Deleware        | <i>mixed</i> | 251 | T234   | 0.24 | 0.15 | 0.61 | Tennessee      | <i>mixed</i> |
| 112 | DE_3   | 0.08 | 0.23 | 0.69 | Deleware        | <i>mixed</i> | 252 | T8     | 0.15 | 0.02 | 0.84 | Tennessee      | NSS          |
| 113 | DE1    | 0.10 | 0.11 | 0.78 | Deleware        | <i>mixed</i> | 253 | Tx303  | 0.56 | 0.06 | 0.38 | Texas          | <i>mixed</i> |
| 114 | DE811  | 0.14 | 0.50 | 0.37 | Deleware        | <i>mixed</i> | 254 | Tx601  | 0.94 | 0.01 | 0.05 | Texas          | TS           |

|            |        |      |      |      |                |              |     |        |      |      |      |              |              |
|------------|--------|------|------|------|----------------|--------------|-----|--------|------|------|------|--------------|--------------|
| <b>115</b> | E2558W | 0.38 | 0.08 | 0.55 | South Africa   | <i>mixed</i> | 255 | Tzi10  | 0.85 | 0.03 | 0.13 | Nigeria      | TS           |
| <b>116</b> | EP1    | 0.23 | 0.03 | 0.74 | Spain          | <i>mixed</i> | 256 | Tzi11  | 0.75 | 0.06 | 0.20 | Nigeria      | <i>mixed</i> |
| <b>117</b> | F2834T | 0.59 | 0.05 | 0.36 | South Africa   | <i>mixed</i> | 257 | Tzi16  | 0.61 | 0.13 | 0.27 | Nigeria      | <i>mixed</i> |
| <b>118</b> | F44    | 0.38 | 0.10 | 0.52 | Florida        | <i>mixed</i> | 258 | Tzi18  | 0.97 | 0.02 | 0.01 | Nigeria      | TS           |
| <b>119</b> | F6     | 0.30 | 0.13 | 0.57 | Florida        | <i>mixed</i> | 259 | Tzi25  | 0.66 | 0.22 | 0.13 | Nigeria      | <i>mixed</i> |
| <b>120</b> | F7     | 0.21 | 0.04 | 0.75 | France-Peronne | <i>mixed</i> | 260 | Tzi9   | 0.95 | 0.04 | 0.01 | Nigeria      | TS           |
| <b>121</b> | GA209  | 0.33 | 0.09 | 0.58 | Georgia        | <i>mixed</i> | 261 | U267Y  | 0.41 | 0.05 | 0.54 | South Africa | <i>mixed</i> |
| <b>122</b> | GT112  | 0.46 | 0.01 | 0.53 | Georgia        | <i>mixed</i> | 262 | VA102  | 0.11 | 0.01 | 0.88 | Virginia     | NSS          |
| <b>123</b> | H105W  | 0.06 | 0.59 | 0.35 | Indiana        | <i>mixed</i> | 263 | Va14   | 0.04 | 0.06 | 0.90 | Virginia     | NSS          |
| <b>124</b> | H49    | 0.11 | 0.13 | 0.76 | Indiana        | <i>mixed</i> | 264 | Va17   | 0.03 | 0.04 | 0.94 | Virginia     | NSS          |
| <b>125</b> | H84    | 0.04 | 0.43 | 0.53 | Indiana        | <i>mixed</i> | 265 | Va22   | 0.05 | 0.04 | 0.91 | Virginia     | NSS          |
| <b>126</b> | H91    | 0.00 | 1.00 | 0.00 | Indiana        | SS           | 266 | Va26   | 0.00 | 0.32 | 0.68 | Virginia     | <i>mixed</i> |
| <b>127</b> | H95    | 0.15 | 0.19 | 0.66 | Indiana        | <i>mixed</i> | 267 | Va35   | 0.02 | 0.00 | 0.97 | Virginia     | NSS          |
| <b>128</b> | H99    | 0.14 | 0.13 | 0.73 | Indiana        | <i>mixed</i> | 268 | Va59   | 0.01 | 0.00 | 0.99 | Virginia     | NSS          |
| <b>129</b> | Hi27   | 0.77 | 0.21 | 0.02 | Hawaii         | <i>mixed</i> | 269 | Va85   | 0.05 | 0.14 | 0.81 | Virginia     | NSS          |
| <b>130</b> | Hp301  | 0.00 | 0.00 | 1.00 | Indiana        | NSS          | 270 | Va99   | 0.00 | 0.25 | 0.75 | Virginia     | <i>mixed</i> |
| <b>131</b> | Hy     | 0.00 | 0.32 | 0.68 | Illinois       | <i>mixed</i> | 271 | VaW6   | 0.24 | 0.18 | 0.58 | Virginia     | <i>mixed</i> |
| <b>132</b> | I137TN | 0.51 | 0.04 | 0.45 | South Africa   | <i>mixed</i> | 272 | W117Ht | 0.22 | 0.12 | 0.67 | Wisconsin    | <i>mixed</i> |
| <b>133</b> | I205   | 0.09 | 0.24 | 0.67 | Iowa           | <i>mixed</i> | 273 | W153R  | 0.11 | 0.13 | 0.76 | Wisconsin    | <i>mixed</i> |
| <b>134</b> | I29    | 0.18 | 0.12 | 0.70 | Iowa           | <i>mixed</i> | 274 | W182B  | 0.02 | 0.16 | 0.83 | Wisconsin    | NSS          |
| <b>135</b> | IA2132 | 0.00 | 0.12 | 0.88 | Iowa           | NSS          | 275 | W22    | 0.02 | 0.21 | 0.78 | Wisconsin    | <i>mixed</i> |
| <b>136</b> | IA5125 | 0.00 | 0.11 | 0.89 | Iowa           | NSS          | 276 | W22_R  | 0.02 | 0.21 | 0.77 | Wisconsin    | <i>mixed</i> |
| <b>137</b> | IDS28  | 0.09 | 0.07 | 0.84 | Iowa           | NSS          | 277 | WD     | 0.05 | 0.10 | 0.85 | Wisconsin    | NSS          |
| <b>138</b> | IDS69  | 0.00 | 0.00 | 1.00 | Iowa           | NSS          | 278 | WF9    | 0.00 | 0.12 | 0.88 | Indiana      | NSS          |
| <b>139</b> | IDS91  | 0.00 | 0.00 | 1.00 | Iowa           | NSS          | 279 | Yu796  | 0.17 | 0.08 | 0.76 | Yugoslavia   | <i>mixed</i> |
| <b>140</b> | Il101  | 0.00 | 0.04 | 0.96 | Illinois       | NSS          |     |        |      |      |      |              |              |

Note: TS = tropical-subtropical, SS = stiff and NSS non-stiff groups.
