# Supplementary material
Source: PubMed Central journal article supplement (PMC3567748)
Supplement: 8aa79271a1308bd2d620199bf831fcb8_genetics.112.147595-20.pdf [file 8aa79271a1308bd2d620199bf831fcb8_genetics.112.147595-20.pdf]

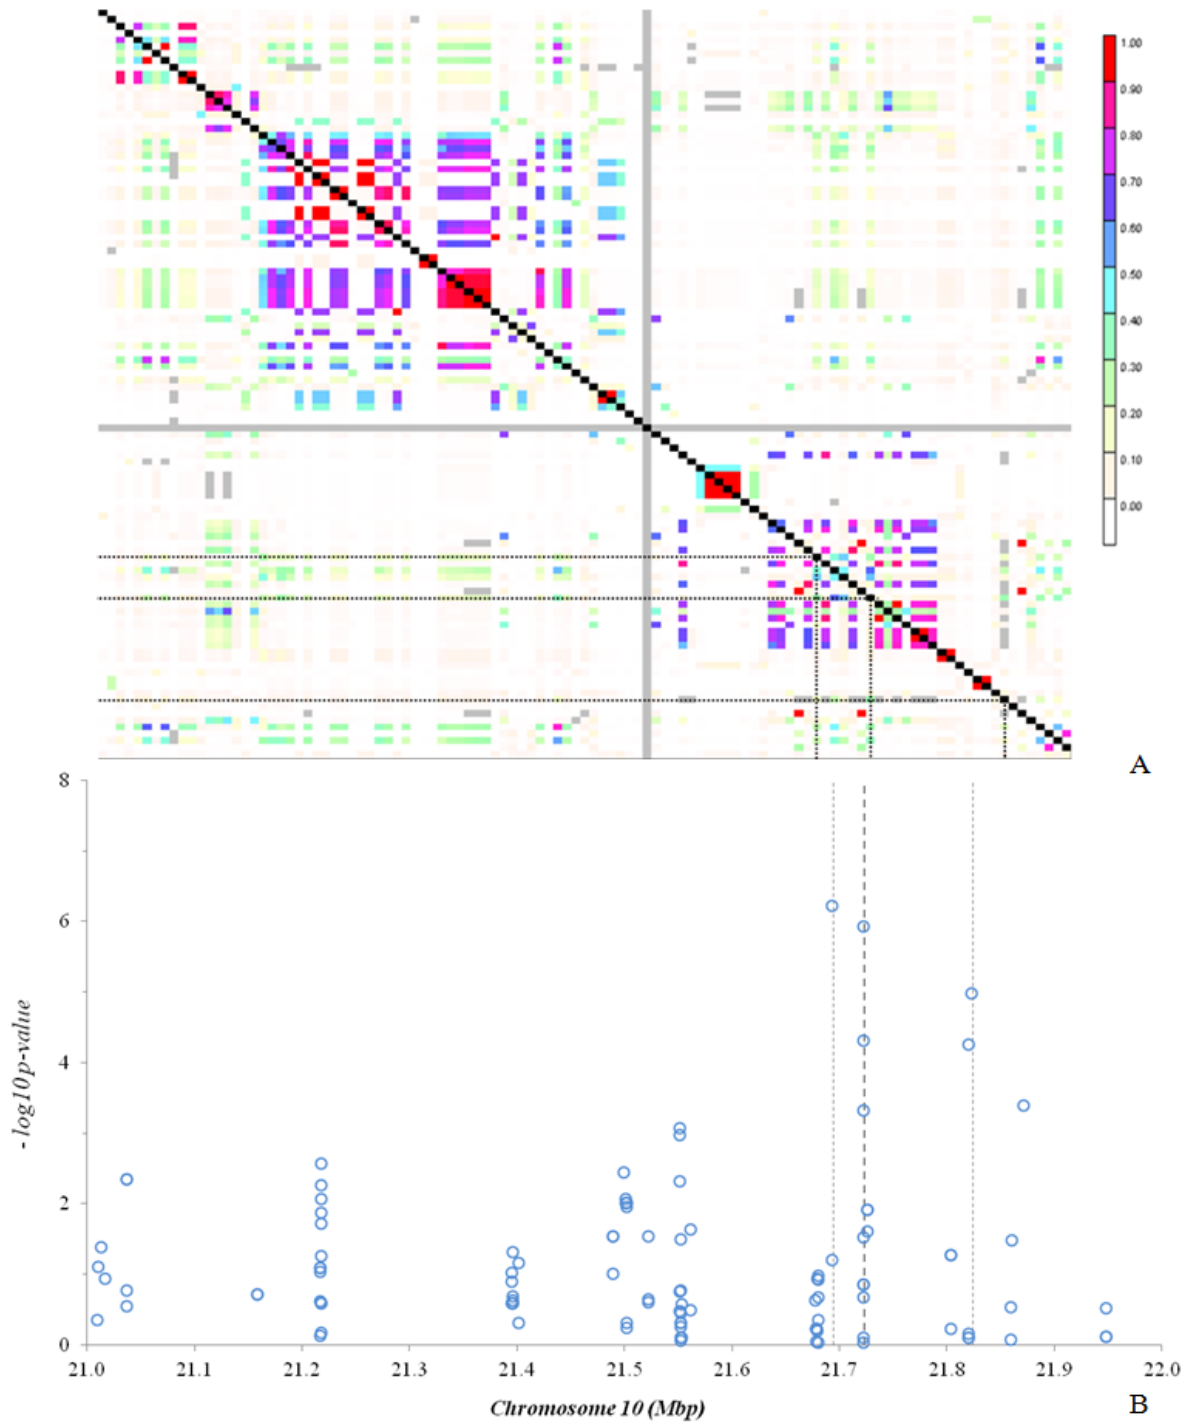

**Figure S5** (A) LD heatmap above showing LD measure ( $r^2$ ) calculated (for each pairwise comparison of SNPs (colors red to white correspond to 1 to 0  $r^2$  values, while black diagonal compares the same SNP to itself) within a chromosome 10 genomic region (21 – 22 mbp) containing 3 significantly associated SNPs indicated by dashed lines (21,693,685 bp, 21,722,883 bp and 21,823,409 bp). (B) Chart with markers indicating  $-\log_{10}$  of p-values of SNPs following genome-wide association analysis with HTR (mutant-to-wildtype height ratio).
