# Supplementary material
Source: PubMed Central journal article supplement (PMC3567748)
Supplement: 8ef1e9b47926637d3c8b1d0d4137b55d_genetics.112.147595-7.pdf [file 8ef1e9b47926637d3c8b1d0d4137b55d_genetics.112.147595-7.pdf]

**Table S5 SNP markers segregation in the IBM linkage mapping population (B73 x Mo17) showing correspondence between direction of QTL effects (Chintamanani *et al.* 2010) and GWAS SNP allele effects.**

| Chr <sup>1</sup> | SNP physical position (bp) | Genotype <sup>2</sup> |      | Allele increasing HR | Parental QTL additive effect increasing HR <sup>3</sup> |
|------------------|----------------------------|-----------------------|------|----------------------|---------------------------------------------------------|
|                  |                            | B73                   | Mo17 |                      |                                                         |
| 5                | 183737260                  | A                     | G    | G                    | na <sup>4</sup>                                         |
| 7                | 148173418                  | G                     | G    | A                    | na <sup>4</sup>                                         |
| 9                | 121167503                  | G                     | G    | G                    | Mo17                                                    |
| 10               | 21693685                   | A                     | G    | G                    | Mo17                                                    |
| 10               | 21722883                   | C                     | T    | T                    | Mo17                                                    |
| 10               | 21823409                   | A                     | C    | C                    | Mo17                                                    |

<sup>1</sup>chr: chromosome; <sup>2</sup>genotypes are homozygtes; <sup>3</sup>additive effect of the QTL: for lesion (LES), the ratings are in terms of a 1–10 scale, while for mutant-to-wild type height ratio (HTR), ratings are in terms of a ratio with “1” meaning a 1:1 ratio. A positive number means the allele for decreased score (lower lesion level), increased ratio, or decreased anthesis differential derived from B73; <sup>4</sup>QTL not detected in IBM population.
