# Supplementary material
Source: PubMed Central journal article supplement (PMC3567748)
Supplement: 49ed59f9f375dc5df0dc2ee915508cd1_genetics.112.147595-1.pdf [file 49ed59f9f375dc5df0dc2ee915508cd1_genetics.112.147595-1.pdf]

**Table S2 List of re-assigned maize lines following membership estimation based on 89 SSR and 5,000 SNP markers.**

| sno | line     | TS         | SS   | NSS  | group        | ts   | ss   | nss  | group | state/country   |
|-----|----------|------------|------|------|--------------|------|------|------|-------|-----------------|
|     |          | 5,000 SNPs |      |      | 89 SSRs      |      |      |      |       |                 |
| 1   | CML218   | 0.93       | 0.01 | 0.06 | TS           | 0.69 | 0.01 | 0.30 | mixed | Mexico          |
| 2   | CML328   | 0.82       | 0.04 | 0.15 | TS           | 0.64 | 0.00 | 0.36 | mixed | Mexico          |
| 3   | CML77    | 0.81       | 0.04 | 0.15 | TS           | 0.69 | 0.01 | 0.30 | mixed | Mexico          |
| 4   | ND246    | 0.12       | 0.08 | 0.80 | NSSS         | 0.24 | 0.00 | 0.76 | mixed | North Dakota    |
| 5   | 4226     | 0.22       | 0.11 | 0.68 | <i>mixed</i> | 0.01 | 0.07 | 0.92 | NSS   | Illinois        |
| 6   | 33-16    | 0.14       | 0.09 | 0.78 | <i>mixed</i> | 0.01 | 0.01 | 0.97 | NSS   | Indiana         |
| 7   | A188     | 0.19       | 0.12 | 0.70 | <i>mixed</i> | 0.01 | 0.01 | 0.98 | NSS   | Minnesota       |
| 8   | A239     | 0.02       | 0.21 | 0.77 | <i>mixed</i> | 0.00 | 0.04 | 0.96 | NSS   | Minnesota       |
| 9   | A556     | 0.21       | 0.12 | 0.67 | <i>mixed</i> | 0.00 | 0.00 | 0.99 | NSS   | Minnesota       |
| 10  | A654     | 0.14       | 0.12 | 0.74 | <i>mixed</i> | 0.00 | 0.08 | 0.92 | NSS   | Minnesota       |
| 11  | A659     | 0.05       | 0.21 | 0.74 | <i>mixed</i> | 0.00 | 0.01 | 0.99 | NSS   | Minnesota       |
| 12  | A661     | 0.12       | 0.18 | 0.69 | <i>mixed</i> | 0.04 | 0.11 | 0.85 | NSS   | Minnesota       |
| 13  | B103     | 0.00       | 0.25 | 0.75 | <i>mixed</i> | 0.01 | 0.16 | 0.83 | NSS   | Iowa            |
| 14  | B115     | 0.13       | 0.12 | 0.75 | <i>mixed</i> | 0.09 | 0.06 | 0.85 | NSS   | Iowa            |
| 15  | B2       | 0.12       | 0.19 | 0.70 | <i>mixed</i> | 0.01 | 0.01 | 0.99 | NSS   | Missouri        |
| 16  | B52      | 0.03       | 0.20 | 0.78 | <i>mixed</i> | 0.00 | 0.01 | 0.99 | NSS   | Iowa            |
| 17  | B57      | 0.21       | 0.09 | 0.70 | <i>mixed</i> | 0.00 | 0.00 | 1.00 | NSS   | Iowa            |
| 18  | B75      | 0.12       | 0.20 | 0.68 | <i>mixed</i> | 0.00 | 0.01 | 0.99 | NSS   | Iowa            |
| 19  | B77      | 0.15       | 0.11 | 0.74 | <i>mixed</i> | 0.00 | 0.08 | 0.92 | NSS   | Iowa            |
| 20  | C49A     | 0.10       | 0.15 | 0.75 | <i>mixed</i> | 0.00 | 0.13 | 0.87 | NSS   | Minnesota       |
| 21  | CH701-30 | 0.07       | 0.18 | 0.75 | <i>mixed</i> | 0.00 | 0.00 | 0.99 | NSS   | Canada - Harrow |
| 22  | CH9      | 0.14       | 0.14 | 0.72 | <i>mixed</i> | 0.01 | 0.00 | 0.99 | NSS   | Canada - Harrow |
| 23  | CI.7     | 0.11       | 0.12 | 0.76 | <i>mixed</i> | 0.00 | 0.00 | 0.99 | NSS   | USDA            |
| 24  | CI21E    | 0.17       | 0.28 | 0.55 | <i>mixed</i> | 0.01 | 0.12 | 0.87 | NSS   | USDA            |
| 25  | CI31A    | 0.20       | 0.17 | 0.63 | <i>mixed</i> | 0.00 | 0.00 | 0.99 | NSS   | USDA            |
| 26  | CI3A     | 0.12       | 0.13 | 0.75 | <i>mixed</i> | 0.01 | 0.08 | 0.91 | NSS   | USDA            |
| 27  | CI64     | 0.39       | 0.08 | 0.53 | <i>mixed</i> | 0.00 | 0.01 | 0.99 | NSS   | USDA            |
| 28  | CI66     | 0.38       | 0.10 | 0.52 | <i>mixed</i> | 0.05 | 0.01 | 0.94 | NSS   | USDA            |
| 29  | CM7      | 0.16       | 0.11 | 0.72 | <i>mixed</i> | 0.00 | 0.06 | 0.94 | NSS   | Canada-Morden   |
| 30  | CMV3     | 0.11       | 0.20 | 0.69 | <i>mixed</i> | 0.01 | 0.15 | 0.85 | NSS   | Minnesota       |
| 31  | CO106    | 0.09       | 0.15 | 0.77 | <i>mixed</i> | 0.01 | 0.02 | 0.97 | NSS   | Canada-Ottawa   |
| 32  | CO125    | 0.18       | 0.10 | 0.73 | <i>mixed</i> | 0.01 | 0.02 | 0.97 | NSS   | Calanda-Ontario |
| 33  | DE_2     | 0.10       | 0.15 | 0.76 | <i>mixed</i> | 0.00 | 0.02 | 0.98 | NSS   | Deleware        |
| 34  | DE1      | 0.10       | 0.11 | 0.78 | <i>mixed</i> | 0.00 | 0.02 | 0.98 | NSS   | Deleware        |
| 35  | E2558W   | 0.38       | 0.08 | 0.55 | <i>mixed</i> | 0.07 | 0.01 | 0.92 | NSS   | South Africa    |

|    |        |      |      |      |              |      |      |      |     |                |
|----|--------|------|------|------|--------------|------|------|------|-----|----------------|
| 36 | GA209  | 0.33 | 0.09 | 0.58 | <i>mixed</i> | 0.02 | 0.00 | 0.98 | NSS | Georgia        |
| 37 | GT112  | 0.46 | 0.01 | 0.53 | <i>mixed</i> | 0.15 | 0.01 | 0.84 | NSS | Georgia        |
| 38 | H49    | 0.11 | 0.13 | 0.76 | <i>mixed</i> | 0.00 | 0.00 | 1.00 | NSS | Indiana        |
| 39 | H95    | 0.15 | 0.19 | 0.66 | <i>mixed</i> | 0.10 | 0.00 | 0.90 | NSS | Indiana        |
| 40 | H99    | 0.14 | 0.13 | 0.73 | <i>mixed</i> | 0.00 | 0.00 | 1.00 | NSS | Indiana        |
| 41 | Hy     | 0.00 | 0.32 | 0.68 | <i>mixed</i> | 0.02 | 0.08 | 0.90 | NSS | Illinois       |
| 42 | K148   | 0.22 | 0.05 | 0.73 | <i>mixed</i> | 0.03 | 0.09 | 0.89 | NSS | Kansas         |
| 43 | K4     | 0.21 | 0.15 | 0.65 | <i>mixed</i> | 0.02 | 0.11 | 0.87 | NSS | Kansas         |
| 44 | K55    | 0.27 | 0.13 | 0.60 | <i>mixed</i> | 0.01 | 0.01 | 0.98 | NSS | Kansas         |
| 45 | K64    | 0.20 | 0.13 | 0.67 | <i>mixed</i> | 0.00 | 0.03 | 0.97 | NSS | Kansas         |
| 46 | Ky21   | 0.18 | 0.15 | 0.67 | <i>mixed</i> | 0.13 | 0.01 | 0.86 | NSS | Kentucky       |
| 47 | L317   | 0.12 | 0.10 | 0.78 | <i>mixed</i> | 0.01 | 0.00 | 0.99 | NSS | Iowa           |
| 48 | M14    | 0.06 | 0.20 | 0.74 | <i>mixed</i> | 0.14 | 0.01 | 0.85 | NSS | Illinois       |
| 49 | M162W  | 0.41 | 0.06 | 0.53 | <i>mixed</i> | 0.00 | 0.00 | 1.00 | NSS | South Africa   |
| 50 | Mo1W   | 0.34 | 0.09 | 0.57 | <i>mixed</i> | 0.17 | 0.00 | 0.83 | NSS | Missouri       |
| 51 | Mo46   | 0.17 | 0.20 | 0.63 | <i>mixed</i> | 0.01 | 0.15 | 0.84 | NSS | Missouri       |
| 52 | MoG    | 0.14 | 0.11 | 0.75 | <i>mixed</i> | 0.00 | 0.00 | 1.00 | NSS | Missouri       |
| 53 | MS1334 | 0.15 | 0.12 | 0.72 | <i>mixed</i> | 0.11 | 0.00 | 0.88 | NSS | Michigan       |
| 54 | N6     | 0.12 | 0.10 | 0.78 | <i>mixed</i> | 0.00 | 0.02 | 0.98 | NSS | Nebraska       |
| 55 | NC222  | 0.25 | 0.09 | 0.67 | <i>mixed</i> | 0.12 | 0.00 | 0.87 | NSS | North Carolina |
| 56 | NC230  | 0.26 | 0.09 | 0.65 | <i>mixed</i> | 0.00 | 0.00 | 0.99 | NSS | North Carolina |
| 57 | NC232  | 0.40 | 0.05 | 0.55 | <i>mixed</i> | 0.09 | 0.07 | 0.84 | NSS | North Carolina |
| 58 | NC236  | 0.21 | 0.13 | 0.66 | <i>mixed</i> | 0.00 | 0.02 | 0.97 | NSS | North Carolina |
| 59 | NC238  | 0.39 | 0.06 | 0.55 | <i>mixed</i> | 0.01 | 0.00 | 0.99 | NSS | North Carolina |
| 60 | NC260  | 0.12 | 0.11 | 0.77 | <i>mixed</i> | 0.00 | 0.01 | 0.99 | NSS | North Carolina |
| 61 | NC33   | 0.32 | 0.07 | 0.60 | <i>mixed</i> | 0.01 | 0.13 | 0.86 | NSS | North Carolina |
| 62 | Oh43   | 0.00 | 0.21 | 0.79 | <i>mixed</i> | 0.00 | 0.00 | 1.00 | NSS | Ohio           |
| 63 | Oh7B   | 0.04 | 0.28 | 0.68 | <i>mixed</i> | 0.00 | 0.03 | 0.97 | NSS | Ohio           |
| 64 | Os420  | 0.08 | 0.19 | 0.73 | <i>mixed</i> | 0.00 | 0.02 | 0.98 | NSS | Iowa           |
| 65 | Pa875  | 0.27 | 0.12 | 0.61 | <i>mixed</i> | 0.02 | 0.00 | 0.98 | NSS | Pennsylvania   |
| 66 | Pa880  | 0.25 | 0.13 | 0.62 | <i>mixed</i> | 0.01 | 0.00 | 0.99 | NSS | Pennsylvania   |
| 67 | R109B  | 0.17 | 0.19 | 0.64 | <i>mixed</i> | 0.03 | 0.11 | 0.86 | NSS | Illinois       |
| 68 | R4     | 0.00 | 0.20 | 0.79 | <i>mixed</i> | 0.00 | 0.02 | 0.98 | NSS | Illinois       |
| 69 | SD44   | 0.13 | 0.18 | 0.69 | <i>mixed</i> | 0.00 | 0.01 | 0.99 | NSS | South Dakota   |
| 70 | T234   | 0.24 | 0.15 | 0.61 | <i>mixed</i> | 0.01 | 0.00 | 0.99 | NSS | Tennessee      |
| 71 | Va26   | 0.00 | 0.32 | 0.68 | <i>mixed</i> | 0.01 | 0.01 | 0.98 | NSS | Virginia       |
| 72 | Va99   | 0.00 | 0.25 | 0.75 | <i>mixed</i> | 0.00 | 0.16 | 0.84 | NSS | Virginia       |
| 73 | W153R  | 0.11 | 0.13 | 0.76 | <i>mixed</i> | 0.00 | 0.15 | 0.85 | NSS | Wisconsin      |
| 74 | W22    | 0.02 | 0.21 | 0.78 | <i>mixed</i> | 0.01 | 0.06 | 0.93 | NSS | Wisconsin      |

|           |        |      |      |      |              |      |      |      |    |                |
|-----------|--------|------|------|------|--------------|------|------|------|----|----------------|
| <b>75</b> | A634   | 0.02 | 0.78 | 0.20 | <i>mixed</i> | 0.00 | 0.90 | 0.10 | SS | Minnesota      |
| <b>76</b> | B37    | 0.00 | 0.62 | 0.38 | <i>mixed</i> | 0.00 | 1.00 | 0.00 | SS | Iowa           |
| <b>77</b> | B64    | 0.28 | 0.68 | 0.04 | <i>mixed</i> | 0.01 | 0.99 | 0.00 | SS | Iowa           |
| <b>78</b> | B76    | 0.01 | 0.50 | 0.49 | <i>mixed</i> | 0.00 | 0.91 | 0.09 | SS | Iowa           |
| <b>79</b> | B84    | 0.00 | 0.76 | 0.24 | <i>mixed</i> | 0.00 | 1.00 | 0.00 | SS | Iowa           |
| <b>80</b> | CM105  | 0.00 | 0.73 | 0.27 | <i>mixed</i> | 0.00 | 1.00 | 0.00 | SS | Canada-Morden  |
| <b>81</b> | CM174  | 0.00 | 0.72 | 0.28 | <i>mixed</i> | 0.00 | 1.00 | 0.00 | SS | Canada-Morden  |
| <b>82</b> | NC250  | 0.25 | 0.48 | 0.27 | <i>mixed</i> | 0.00 | 0.94 | 0.06 | SS | North Carolina |
| <b>83</b> | A272   | 0.53 | 0.04 | 0.42 | <i>mixed</i> | 0.86 | 0.02 | 0.12 | TS | South Africa   |
| <b>84</b> | CML103 | 0.70 | 0.03 | 0.27 | <i>mixed</i> | 0.99 | 0.00 | 0.01 | TS | Mexico         |
| <b>85</b> | CML108 | 0.70 | 0.03 | 0.27 | <i>mixed</i> | 0.90 | 0.00 | 0.10 | TS | Mexico         |
| <b>86</b> | NC264  | 0.56 | 0.04 | 0.40 | <i>mixed</i> | 0.97 | 0.02 | 0.02 | TS | North Carolina |
| <b>87</b> | NC318  | 0.55 | 0.04 | 0.41 | <i>mixed</i> | 0.97 | 0.00 | 0.03 | TS | North Carolina |
| <b>88</b> | NC320  | 0.58 | 0.06 | 0.37 | <i>mixed</i> | 0.99 | 0.00 | 0.01 | TS | North Carolina |
| <b>89</b> | Tzi11  | 0.75 | 0.06 | 0.20 | <i>mixed</i> | 0.81 | 0.00 | 0.18 | TS | Nigeria        |

Note: TS = tropical-subtropical, SS = stiff and NSS non-stiff groups
