# Supplementary material
Source: PubMed Central journal article supplement (PMC3567748)
Supplement: ad13f7aa93b8dc4c6bcf8bd6c008e242_genetics.112.147595-19.pdf [file ad13f7aa93b8dc4c6bcf8bd6c008e242_genetics.112.147595-19.pdf]

**Table S4** Proportion of phenotypic variance ( $R^2$ ) explained by population structure and the kinship matrix (coancestry).

| Germplasm group | $R^2$ |       |
|-----------------|-------|-------|
|                 | HTR   | LES   |
| TS              | 0.107 | 0.042 |
| SS              | 0.128 | 0.136 |
| NSS             | 0.001 | 0.010 |
| TS + SS + NSS   | 0.165 | 0.138 |
| Kinship matrix  | 0.771 | 0.923 |
