# Supplementary material
Source: PubMed Central journal article supplement (PMC3567748)
Supplement: cb0553cf663476ef3a0086155c0a1451_genetics.112.147595-10.pdf [file cb0553cf663476ef3a0086155c0a1451_genetics.112.147595-10.pdf]

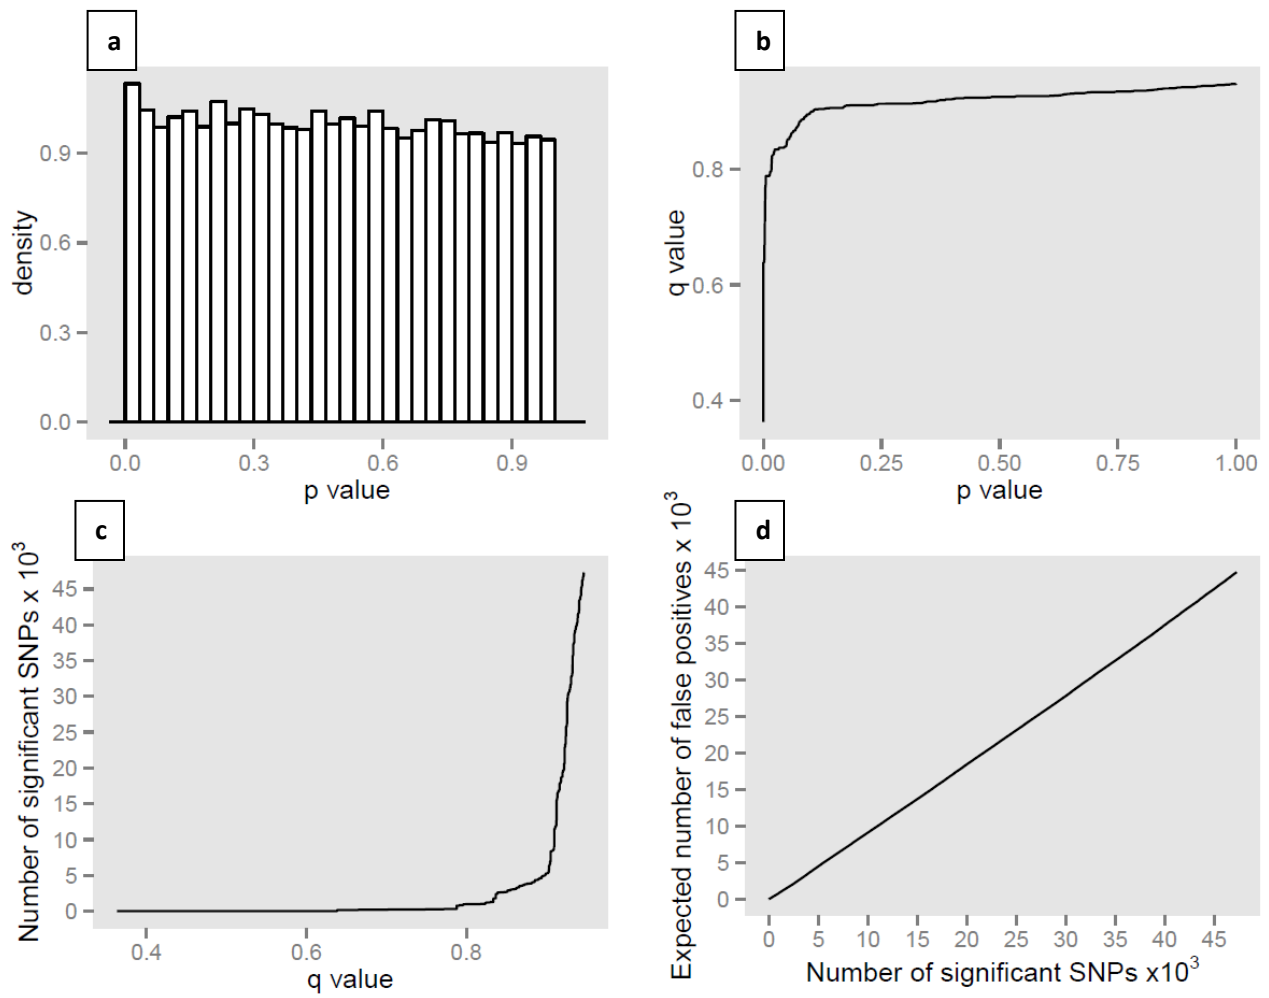

**Figure S4** Estimating the false discovery rate for SNP marker association with LES: (a) A density histogram showing p-value distribution of 47,253 SNP markers following genome-wide association analysis. (b) The q-values plotted against their respective p-values. (c) The number of SNPs plotted against each of the respective q-value estimates. (d) The expected number of false positive SNPs versus the total number of significant SNPs given by the q-values.
